# Supplementary material
Source: publisher figshare collection journal article supplement (https://tandf.figshare.com/ndownloader/files/12388496)
Supplement: Supplementary file 1 [file 12388496]

**Supplemental Material
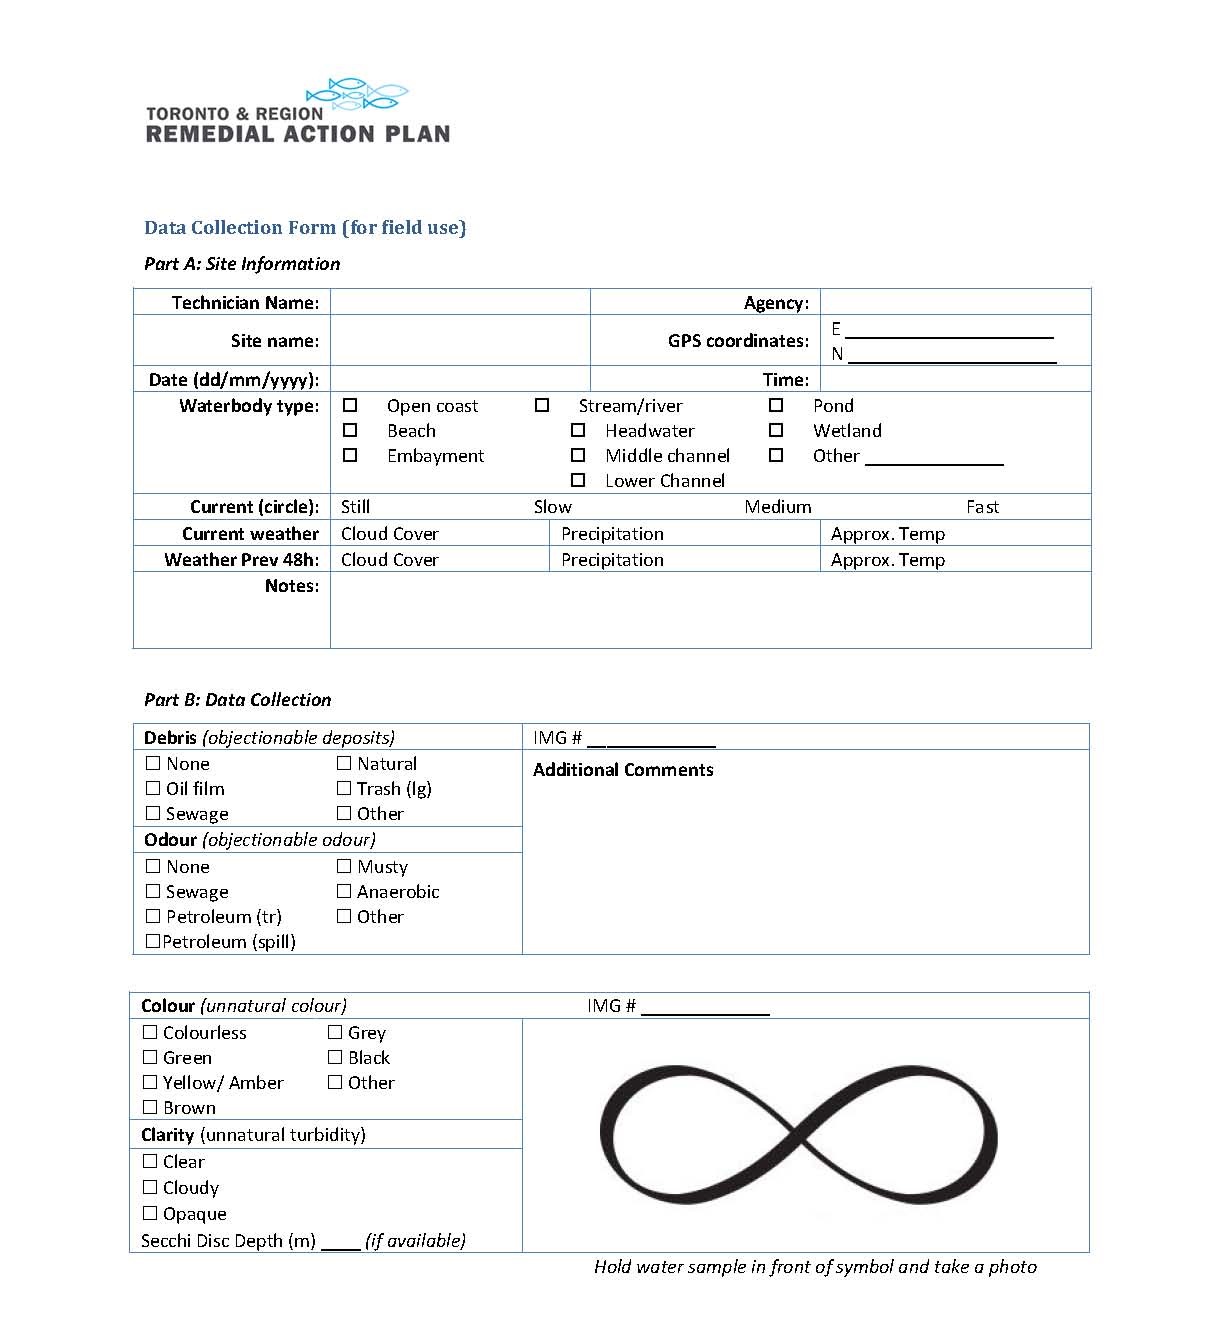
**

**Figure S1:** Sample data collection sheet for the Toronto and Region Remedial Action Plan (RAP) aesthetics monitoring program. Field staff recorded observations for debris, odour, colour, and clarity each time they visited a sampling site during 2012, 2013, and 2015.

**Table S1.** Etobicoke Creek monitoring sites sampled for aesthetic condition during 2012, 2013, and/or 2015. Sites are identified by station ID and coordinates, along with associated monitoring program or project.

| **Station ID** | **Coordinates** | | **Monitoring Program/Project** | **Description** | **# Aesthetics samples** | | |
| --- | --- | --- | --- | --- | --- | --- | --- |
| **Easting** | **Northing** | **2012** | **2013** | **2015** |
| 6008000702 | 606440 | 4836994 | RWMP/PWQMN | Monthly Water Quality Sampling | 6 | 11 | 6 |
| 6008000602 | 616234.3 | 4829016 | RWMP/PWQMN | Monthly Water Quality Sampling | 6 | 11 | 6 |
| EC001WM | 617522 | 4827032 | RWMP | Fish and Benthic Community and In-stream Habitat | 2 | 3 | 0 |
| EC002WM | 615821 | 4829379 | RWMP | Fish and Benthic Community and In-stream Habitat | 1 | 1 | 0 |
| EC003WM | 615461 | 4832007 | RWMP | Fish and Benthic Community and In-stream Habitat | 1 | 2 | 0 |
| EC004WM | 613862 | 4833129 | RWMP | Fish and Benthic Community and In-stream Habitat | 1 | 3 | 0 |
| EC005WM | 610156 | 4835540 | RWMP | Fish and Benthic Community and In-stream Habitat | 1 | 3 | 0 |
| EC006WM | 607761 | 4835487 | RWMP | Fish and Benthic Community and In-stream Habitat | 1 | 3 | 0 |
| EC007WM | 607114 | 4836740 | RWMP | Fish and Benthic Community and In-stream Habitat | 1 | 4 | 0 |
| EC008WM | 603557 | 4836311 | RWMP | Fish and Benthic Community and In-stream Habitat | 1 | 2 | 0 |
| EC009WM | 605509 | 4838947 | RWMP | Fish and Benthic Community and In-stream Habitat | 0 | 3 | 0 |
| EC010WM | 600430 | 4843100 | RWMP | Fish and Benthic Community and In-stream Habitat | 1 | 4 | 0 |
| EC011WM | 599045 | 4838991 | RWMP | Fish and Benthic Community and In-stream Habitat | 1 | 2 | 1 |
| EC012WM | 595157 | 4843478 | RWMP | Fish and Benthic Community and In-stream Habitat | 1 | 3 | 0 |
| EC013WM | 592831 | 4844606 | RWMP | Fish and Benthic Community and In-stream Habitat | 1 | 4 | 0 |
| EC014WM | 592494 | 4843068 | RWMP | Fish and Benthic Community and In-stream Habitat | 1 | 3 | 0 |
| EC1 | 593182 | 4846101 | Mayfield CAMP | Fish, Habitat, Benthics and Water Quality | 0 | 8 | 1 |
| EC3 | 593471 | 4844165 | Mayfield CAMP | Fish, Habitat, Benthics and Water Quality | 0 | 9 | 1 |
| EC4 | 594776 | 4844647 | Mayfield CAMP | Fish, Habitat, Benthics and Water Quality | 0 | 10 | 1 |
| EC6 | 596806 | 4845757 | Mayfield CAMP | Fish, Habitat, Benthics and Water Quality | 0 | 5 | 1 |
| Etobicoke 2HC4108 | 599777 | 4843598 | Special Project |  | 0 | 1 | 0 |
| Etobicoke 2HC6157 | 589719 | 4842055 | Special Project |  | 0 | 1 | 0 |
| Etobicoke SWD-BS01 | 597054 | 4841711 | Special Project |  | 0 | 0 | **2** |
| GET-1 | 616534.1 | 4828589 | RWMP | Stream Fluvial Geomorphology | 0 | 1 | 0 |
| GET-2 | 615514.9 | 4831842 | RWMP | Stream Fluvial Geomorphology | 0 | 1 | 0 |
| GET-6 | 600831.4 | 4837568 | RWMP | Stream Fluvial Geomorphology | 0 | 1 | 0 |
| GET-7 | 600737.7 | 4842964 | RWMP | Stream Fluvial Geomorphology | 0 | 1 | 0 |
| GET-8 | 594777.2 | 4844454 | RWMP | Stream Fluvial Geomorphology | 0 | 1 | 0 |
| Little Etobicoke Creek | 615520 | 4829577 | RWMP | Monthly Water Quality Sampling | 0 | 6 | 6 |
| Lower Etobicoke US | 610933 | 4834442 | RWMP | Monthly Water Quality Sampling | 0 | 5 | 6 |
| Mayfield | 595028 | 4843488 | RWMP/PWQMN | Monthly Water Quality Sampling | 8 | 14 | 7 |
| Spring Creek | 607990 | 4838157 | RWMP/PWQMN | Monthly Water Quality Sampling | 0 | 6 | 6 |
| Tributary 3 | 607825 | 4835477 | RWMP/PWQMN | Monthly Water Quality Sampling | 0 | 5 | 6 |
| Tributary 4 | 615546 | 4831543 | RWMP/PWQMN | Monthly Water Quality Sampling | 0 | 6 | 6 |

**Table S2.** Mimico Creek monitoring sites sampled for aesthetic condition during 2012, 2013, and/or 2015. Sites are identified by station ID and coordinates, along with associated monitoring program or project.

| **Station ID** | **Coordinates** | | **Monitoring Program/Project** | **Description** | **# Samples** | | |
| --- | --- | --- | --- | --- | --- | --- | --- |
| **Easting** | **Northing** | **2012** | **2013** | **2015** |
| 6008200302 | 621584.8 | 4831713 | RWMP/PWQMN | Monthly Water Quality Sampling | 6 | 11 | 6 |
| GMI-2 | 619340.5 | 4833788 | RWMP | Stream Fluvial Geomorphology | 0 | 1 | 0 |
| GMI-5 | 610814.7 | 4840271 | RWMP | Stream Fluvial Geomorphology | 0 | 1 | 0 |
| Mimico Creek Mouth | 622662 | 4830890 | Waterfront | Fish Community Survey | 1 | 0 | 0 |
| MM001WM | 622415 | 4831016 | RWMP | Fish and Benthic Community and In-stream Habitat | 2 | 1 | 0 |
| MM002WM | 617849 | 4834614 | RWMP | Fish and Benthic Community and In-stream Habitat | 1 | 1 | 0 |
| MM003WM | 613848.9 | 4837916 | RWMP | Fish and Benthic Community and In-stream Habitat | 6 | 14 | 6 |
| MM004WM | 609810 | 4841714 | RWMP | Fish and Benthic Community and In-stream Habitat | 0 | 2 | 0 |
| MM005WM | 608669 | 4840087 | RWMP | Fish and Benthic Community and In-stream Habitat | 2 | 1 | 0 |
| NCD Mimico Creek, CTS04 | 606252 | 4844071 | Natural Channel Design | Fish and Benthic Community and In-stream Habitat | 1 | 0 | 0 |
| NCD Mimico Creek, UMP2 | 606512 | 4843802 | Natural Channel Design | Fish and Benthic Community and In-stream Habitat | 1 | 0 | 0 |
| NCD21 | 608447 | 4840243 | Natural Channel Design | Fish and Benthic Community and In-stream Habitat | 0 | 2 | 0 |
| NCD21-1C | 608295 | 4840314 | Natural Channel Design | Fish and Benthic Community and In-stream Habitat | 1 | 4 | 0 |
| NCD21-2 | 608601 | 4840158 | Natural Channel Design | Fish and Benthic Community and In-stream Habitat | 0 | 1 | 0 |
| NCD21-4C | 608680 | 4840069 | Natural Channel Design | Fish and Benthic Community and In-stream Habitat | 3 | 4 | 0 |

**Table S3** Humber River monitoring sites sampled for aesthetic condition during 2012, 2013, and/or 2015. Sites are identified by station ID and coordinates, along with associated monitoring program or project.

| **Station ID** | **Coordinates** | | **Monitoring Program/Project** | **Description** | **# Samples** | | |
| --- | --- | --- | --- | --- | --- | --- | --- |
| **Easting** | **Northing** | **2012** | **2013** | **2015** |
| 6008300202 | 610458.7 | 4843562 | RWMP | Monthly Water Quality Sampling | 6 | 10 | 7 |
| 6008300402 | 614148.1 | 4850423 | RWMP | Monthly Water Quality Sampling | 7 | 0 | 7 |
| 6008301202 | 620487.6 | 4836845 | RWMP | Monthly Water Quality Sampling | 6 | 9 | 7 |
| 6008310302 | 606384.7 | 4845870 | RWMP/PWQMN | Monthly Water Quality Sampling | 6 | 9 | 7 |
| 6008300902 | 602980.1 | 4860243 | RWMP/PWQMN | Monthly Water Quality Sampling | 8 | 10 | 6 |
| 6008301802 | 596071 | 4864366 | RWMP/PWQMN | Monthly Water Quality Sampling | 8 | 10 | 7 |
| 6008301902 | 621663 | 4834265 | RWMP/PWQMN | Monthly Water Quality Sampling | 6 | 11 | 7 |
| 6008302002 | 610386.4 | 4851861 | RWMP/PWQMN | Monthly Water Quality Sampling | 8 | 11 | 6 |
| 6008310402 | 593560.4 | 4864112 | RWMP/PWQMN | Monthly Water Quality Sampling | 8 | 11 | 7 |
| BG1 | 622761 | 4865175 | Special Project |  | 0 | 2 | 0 |
| BG2 | 622913 | 4864891 | Special Project |  | 0 | 2 | 0 |
| BG3 | 622406 | 4864778 | Special Project |  | 0 | 2 | 0 |
| Boyce Creek, Caledon East | 591235.2 | 4858714 | Caledon East Water Taking | Fish and Benthic Community and In-stream Habitat | 1 | 0 | 0 |
| CC-DS | 610121 | 4856887 | Special Project |  | 0 | 1 | 0 |
| CC-H11 | 609919 | 4857059 | Special Project |  | 0 | 1 | 0 |
| CC-H16 | 609666 | 4857102 | Special Project |  | 0 | 1 | 0 |
| CC-H3 | 609189 | 4857460 | Special Project |  | 0 | 1 | 0 |
| CC-US | 609665 | 4858046 | Special Project |  | 0 | 1 | 0 |
| GHU-10 | 604103.4 | 4846958 | RWMP | Stream Fluvial Geomorphology | 0 | 1 | 0 |
| GHU-13 | 608291 | 4851165 | RWMP | Stream Fluvial Geomorphology | 0 | 1 | 0 |
| GHU-15 | 603694.1 | 4849312 | RWMP | Stream Fluvial Geomorphology | 0 | 1 | 0 |
| GHU-25 | 609739 | 4859715 | RWMP | Stream Fluvial Geomorphology | 0 | 1 | 0 |
| GHU-26 | 606449.1 | 4859067 | RWMP | Stream Fluvial Geomorphology | 0 | 1 | 0 |
| GHU-31 | 603658 | 4864688 | RWMP | Stream Fluvial Geomorphology | 0 | 1 | 0 |
| GHU-8 | 606979.4 | 4846895 | RWMP | Stream Fluvial Geomorphology | 0 | 1 | 0 |
| GHU-9 | 606406.6 | 4846878 | RWMP | Stream Fluvial Geomorphology | 0 | 1 | 0 |
| Glen Haffy 1 | 584678 | 4866262 | Special Project | Water Quality Sample | 1 | 0 | 1 |
| GREENBROOK | 622784.3 | 6439253 | Special Project | Water Quality Sample | 0 | 3 | 0 |
| HU001WM | 612675 | 4854236 | RWMP | Fish and Benthic Community and In-stream Habitat | 0 | 4 | 0 |
| HU002WM | 607400 | 4857024 | RWMP | Fish and Benthic Community and In-stream Habitat | 1 | 4 | 0 |
| HU003WM | 621606 | 4834357 | RWMP | Fish and Benthic Community and In-stream Habitat | 1 | 3 | 0 |
| HU004WM | 619552 | 4836846 | RWMP | Fish and Benthic Community and In-stream Habitat | 1 | 3 | 1 |
| HU005WM | 618724 | 4838794 | RWMP | Fish and Benthic Community and In-stream Habitat | 1 | 4 | 0 |
| HU006WM | 622437 | 4838210 | RWMP | Fish and Benthic Community and In-stream Habitat | 0 | 5 | 0 |
| HU007WM | 618002 | 4840197 | RWMP | Fish and Benthic Community and In-stream Habitat | 1 | 5 | 0 |
| HU008WM | 617254 | 4841698 | RWMP | Fish and Benthic Community and In-stream Habitat | 0 | 3 | 0 |
| HU009WM | 616794 | 4842974 | RWMP | Fish and Benthic Community and In-stream Habitat | 0 | 2 | 0 |
| HU010WM | 614940 | 4844739 | RWMP | Fish and Benthic Community and In-stream Habitat | 8 | 14 | 7 |
| HU011WM | 612859 | 4847390 | RWMP | Fish and Benthic Community and In-stream Habitat | 2 | 5 | 0 |
| HU012WM | 614019 | 4847244 | RWMP | Fish and Benthic Community and In-stream Habitat | 1 | 2 | 0 |
| HU013WM | 606269 | 4845923 | RWMP | Fish and Benthic Community and In-stream Habitat | 1 | 5 | 0 |
| HU014WM | 605113 | 4848567 | RWMP | Fish and Benthic Community and In-stream Habitat | 1 | 4 | 1 |
| HU015WM | 602944 | 4877900 | RWMP | Fish and Benthic Community and In-stream Habitat | 1 | 4 | 0 |
| HU016WM | 601866 | 4847193 | RWMP | Fish and Benthic Community and In-stream Habitat | 0 | 4 | 0 |
| HU018WM | 608577 | 4849990 | RWMP | Fish and Benthic Community and In-stream Habitat | 0 | 1 | 0 |
| HU019WM | 609706 | 4851282 | RWMP | Fish and Benthic Community and In-stream Habitat | 0 | 2 | 0 |
| HU020WM | 615032 | 4857094 | RWMP | Fish and Benthic Community and In-stream Habitat | 1 | 5 | 0 |
| HU021WM | 612397 | 4856267 | RWMP | Fish and Benthic Community and In-stream Habitat | 1 | 1 | 1 |
| HU022WM | 609770 | 4859771 | RWMP | Fish and Benthic Community and In-stream Habitat | 1 | 4 | 1 |
| HU023WM | 610249 | 4862001 | RWMP | Fish and Benthic Community and In-stream Habitat | 1 | 2 | 0 |
| HU024WM | 611331 | 4861795 | RWMP | Fish and Benthic Community and In-stream Habitat | 2 | 4 | 1 |
| HU025WM | 620147 | 4866335 | RWMP | Fish and Benthic Community and In-stream Habitat | 1 | 4 | 1 |
| HU026WM | 603030 | 4860208 | RWMP | Fish and Benthic Community and In-stream Habitat | 1 | 3 | 1 |
| HU027WM | 603604 | 4861949 | RWMP | Fish and Benthic Community and In-stream Habitat | 1 | 3 | 0 |
| HU028WM | 601808 | 4861781 | RWMP | Fish and Benthic Community and In-stream Habitat | 1 | 3 | 0 |
| HU029WM | 598545 | 4859924 | RWMP | Fish and Benthic Community and In-stream Habitat | 1 | 3 | 0 |
| HU030WM | 597050 | 4859662 | RWMP | Fish and Benthic Community and In-stream Habitat | 1 | 4 | 1 |
| HU031WM | 593674 | 4860862 | RWMP | Fish and Benthic Community and In-stream Habitat | 1 | 2 | 0 |
| HU032WM | 592231 | 4858550 | RWMP | Fish and Benthic Community and In-stream Habitat | 1 | 4 | 1 |
| HU033WM | 594130 | 4864603 | RWMP | Fish and Benthic Community and In-stream Habitat | 1 | 3 | 0 |
| HU034WM | 592798 | 4865364 | RWMP | Fish and Benthic Community and In-stream Habitat | 1 | 4 | 1 |
| HU035WM | 588863 | 4864886 | RWMP | Fish and Benthic Community and In-stream Habitat | 1 | 3 | 0 |
| HU036WM | 591448 | 4868406 | RWMP | Fish and Benthic Community and In-stream Habitat | 1 | 4 | 1 |
| HU037WM | 587124 | 4868553 | RWMP | Fish and Benthic Community and In-stream Habitat | 1 | 3 | 0 |
| HU038WM | 583304 | 4867527 | RWMP | Fish and Benthic Community and In-stream Habitat | 1 | 3 | 0 |
| HU039WM | 594695 | 4846710 | RWMP | Fish and Benthic Community and In-stream Habitat | 1 | 4 | 0 |
| HU1 | 593573 | 4846590 | Mayfield CAMP | Fish, Habitat, Benthics and Water Quality | 0 | 7 | 1 |
| HU1RWMP | 618678.4 | 4848311 | RWMP | Monthly Water Quality Sampling | 7 | 11 | 7 |
| HU3 | 595878 | 4847179 | Mayfield CAMP | Fish, Habitat, Benthics and Water Quality | 0 | 8 | 1 |
| HU4 | 596564 | 4846854 | Mayfield CAMP | Fish, Habitat, Benthics and Water Quality | 0 | 2 | 0 |
| HUMBER 2HC4209 | 592866 | 4860313 | Special Project |  | 0 | 1 | 0 |
| HUMBER 2HC5317 | 611888 | 4845064 | Special Project |  | 0 | 1 | 0 |
| HUMBER 2HC5369 | 618782 | 4849814 | Special Project |  | 0 | 1 | 0 |
| HUMBER 2HC5437 | 593009 | 4864015 | Special Project |  | 0 | 1 | 0 |
| HUMBER 2HC5675 | 600893 | 4860638 | Special Project |  | 0 | 1 | 0 |
| HUMBER 2HC6046 | 597735 | 4866106 | Special Project |  | 0 | 1 | 0 |
| HUMBER 2HC6595 | 615118 | 4857635 | Special Project |  | 0 | 1 | 0 |
| Humber River | 593385 | 4864454 | Waterfront | Fish Community Survey | 1 | 0 | 0 |
| Humber River Mouth | 623348 | 4832095 | Waterfront | Fish Community Survey | 1 | 0 | 0 |
| Humber River sma 1 5 6 | 591236 | 4858721 | Waterfront | Fish Community Survey | 1 | 0 | 0 |
| Humber River smb 1 2 3 | 591576 | 4858380 | Waterfront | Fish Community Survey | 1 | 0 | 0 |
| Humber River sme 1 2 3 | 591069 | 4857781 | Waterfront | Fish Community Survey | 1 | 0 | 0 |
| Humber River: online pond at Albion Hills CA | 593870 | 4864635 | Waterfront | Fish Community Survey | 1 | 0 | 0 |
| W1 | 607962 | 4863362 | Nobleton Phosphorus | Water Quality and Stream Flow Measurements | 1 | 2 | 0 |
| W11 | 607073 | 4861498 | Nobleton Phosphorus | Water Quality and Stream Flow Measurements | 2 | 3 | 0 |
| W14 | 609137 | 4861889 | Nobleton Phosphorus | Water Quality and Stream Flow Measurements | 2 | 3 | **0** |
| W2 | 608781 | 4864182 | Nobleton Phosphorus | Water Quality and Stream Flow Measurements | 2 | 3 | 0 |
| W2A | 609566 | 4862963 | Nobleton Phosphorus | Water Quality and Stream Flow Measurements | 2 | 3 | 0 |
| W4 | 608934 | 4862079 | Nobleton Phosphorus | Water Quality and Stream Flow Measurements | 2 | 3 | 0 |
| W6 | 607948 | 4861800 | Nobleton Phosphorus | Water Quality and Stream Flow Measurements | 3 | 2 | 0 |
| W9 | 608574 | 4861945 | Nobleton Phosphorus | Water Quality and Stream Flow Measurements | 1 | 2 | 0 |

**Table S4** Don River monitoring sites sampled for aesthetic condition during 2012, 2013, and/or 2015. Sites are identified by station ID and coordinates, along with associated monitoring program or project.

| **Station ID** | **Coordinates** | | **Monitoring Program/Project** | **Description** | **# Samples** | | |
| --- | --- | --- | --- | --- | --- | --- | --- |
| **Easting** | **Northing** | **2012** | **2013** | **2015** |
| 6008500402 | 622014.1 | 4851207 | RWMP | Monthly Water Quality Sampling | 6 | 11 | 6 |
| 6008500302 | 628953.7 | 4851256 | RWMP | Monthly Water Quality Sampling | 6 | 10 | 6 |
| 6008501402 | 632000.3 | 4838576 | RWMP | Monthly Water Quality Sampling | 6 | 10 | 6 |
| DM 6.0 | 634378.4 | 4840251 | RWMP | Monthly Water Quality Sampling | 6 | 11 | 6 |
| DN001WM | 631856 | 4837539 | RWMP | Fish and Benthic Community and In-stream Habitat | 1 | 1 | 0 |
| DN002WM | 634781 | 4840074 | RWMP | Fish and Benthic Community and In-stream Habitat | 1 | 1 | 1 |
| DN003WM | 638492 | 4841024 | RWMP | Fish and Benthic Community and In-stream Habitat | 1 | 1 | 0 |
| DN004WM | 639773 | 4842304 | RWMP | Fish and Benthic Community and In-stream Habitat | 1 | 1 | 0 |
| DN005WM | 634783 | 4842284 | RWMP | Fish and Benthic Community and In-stream Habitat | 0 | 1 | 0 |
| DN006WM | 632940 | 4846545 | RWMP | Fish and Benthic Community and In-stream Habitat | 1 | 1 | 1 |
| DN007WM | 630935 | 4848585 | RWMP | Fish and Benthic Community and In-stream Habitat | 1 | 1 | 0 |
| DN008WM | 630252 | 4850878 | RWMP | Fish and Benthic Community and In-stream Habitat | 7 | 12 | 6 |
| DN009WMb | 630761 | 4853918 | RWMP | Fish and Benthic Community and In-stream Habitat | 1 | 1 | 0 |
| DN010WMb | 629223 | 4854403 | RWMP | Fish and Benthic Community and In-stream Habitat | 1 | 1 | 0 |
| DN011WM | 626295 | 4858247 | RWMP | Fish and Benthic Community and In-stream Habitat | 1 | 1 | 0 |
| DN012WM | 633807 | 4841005 | RWMP | Fish and Benthic Community and In-stream Habitat | 1 | 1 | 0 |
| DN013WM | 632696 | 4842247 | RWMP | Fish and Benthic Community and In-stream Habitat | 1 | 1 | 0 |
| DN014WM | 631632 | 4842135 | RWMP | Fish and Benthic Community and In-stream Habitat | 1 | 2 | 0 |
| DN015WM | 628127 | 4844733 | RWMP | Fish and Benthic Community and In-stream Habitat | 1 | 2 | 0 |
| DN016WM | 622632 | 4850455 | RWMP | Fish and Benthic Community and In-stream Habitat | 1 | 1 | 0 |
| DN017WM | 621273 | 4852573 | RWMP | Fish and Benthic Community and In-stream Habitat | 1 | 1 | 0 |
| DN018WM | 618467 | 4854092 | RWMP | Fish and Benthic Community and In-stream Habitat | 1 | 1 | 0 |
| DN019WM | 618590 | 4856478 | RWMP | Fish and Benthic Community and In-stream Habitat | 1 | 1 | 1 |
| DN020WM | 628139 | 4853048 | RWMP | Fish and Benthic Community and In-stream Habitat | 1 | 1 | 0 |
| DN021WM | 626454 | 4853018 | RWMP | Fish and Benthic Community and In-stream Habitat | 1 | 1 | 0 |
| DN022WM | 623746 | 4855647 | RWMP | Fish and Benthic Community and In-stream Habitat | 1 | 1 | 0 |
| DN023WM | 624590 | 4856480 | RWMP | Fish and Benthic Community and In-stream Habitat | 1 | 1 | 0 |
| Lower Don 1 | 632668 | 4835377 | Waterfront | Fish Community Survey | 1 | 0 | 0 |
| Lower Don 2 | 633150 | 4834616 | Waterfront | Fish Community Survey | 1 | 0 | 0 |
| Lower Don River - Keating Channel | 632734 | 4834060 | Waterfront | Fish Community Survey | 8 | 0 | 0 |
| Lower Don River - North | 632920 | 4834920 | Waterfront | Fish Community Survey | 2 | 0 | 0 |
| Lower Don River - South | 633251 | 4834460 | Waterfront | Fish Community Survey | 5 | 0 | 0 |
| NCD-12B | 617373 | 4854518 | Natural Channel Design | Fish and Benthic Community and In-stream Habitat | 3 | 0 | 0 |

**Table S5** Highland Creek monitoring sites sampled for aesthetic condition during 2012, 2013, and/or 2015. Sites are identified by station ID and coordinates, along with associated monitoring program or project.

| **Station ID** | **Coordinates** | | **Monitoring Program/Project** | **Description** | **# Samples** | | |
| --- | --- | --- | --- | --- | --- | --- | --- |
| **Easting** | **Northing** | **2012** | **2013** | **2015** |
| 6009400202 | 647428.8 | 4849056 | RWMP | Monthly Water Quality Sampling | 7 | 11 | 7 |
| Highland Creek Mouth | 649316 | 4847690 | Waterfront | Fish Community Survey | 7 | 0 | 1 |
| HL001WM | 649505 | 4848112 | RWMP | Fish and Benthic Community and In-stream Habitat | 1 | 1 | 1 |
| HL002WM | 647831 | 4848747 | RWMP | Fish and Benthic Community and In-stream Habitat | 1 | 2 | 1 |
| HL003WM | 644819 | 4847684 | RWMP | Fish and Benthic Community and In-stream Habitat | 1 | 1 | 1 |
| HL004WM | 644578 | 4848691 | RWMP | Fish and Benthic Community and In-stream Habitat | 1 | 0 | 0 |
| HL005WM | 642744 | 4849332 | RWMP | Fish and Benthic Community and In-stream Habitat | 0 | 3 | 1 |
| HL006WM | 642811 | 4850389 | RWMP | Fish and Benthic Community and In-stream Habitat | 0 | 1 | 1 |
| HL007WM | 640004 | 4850323 | RWMP | Fish and Benthic Community and In-stream Habitat | 1 | 1 | 1 |
| HL008WM | 641456 | 4852389 | RWMP | Fish and Benthic Community and In-stream Habitat | 1 | 1 | 1 |
| HL009WM | 641822 | 4845606 | RWMP | Fish and Benthic Community and In-stream Habitat | 1 | 1 | 1 |
| HL010WM | 641362 | 4846340 | RWMP | Fish and Benthic Community and In-stream Habitat | 2 | 1 | 1 |
| HL011WM | 637357 | 4849645 | RWMP | Fish and Benthic Community and In-stream Habitat | 1 | 1 | 0 |
| HIGHLAND 2HC6576 | 637475 | 4849674 | Special Project |  | 0 | 1 | 0 |
| HIGHLAND 2HC6602 | 648284 | 4848520 | Special Project |  | 0 | 1 | 0 |

**Table S6** Rouge River monitoring sites sampled for aesthetic condition during 2012, 2013, and/or 2015. Sites are identified by station ID and coordinates, along with associated monitoring program or project.

| **Station ID** | **Coordinates** | | **Monitoring Program/Project** | **Description** | **# Samples** | | |
| --- | --- | --- | --- | --- | --- | --- | --- |
| **Easting** | **Northing** | **2012** | **2013** | **2015** |
| 6009700702 | 644300 | 4857816 | RWMP | Monthly Water Quality Sampling | 6 | 11 | 5 |
| 6009701102 | 648006.9 | 4852511 | RWMP/PWQMN | Monthly Water Quality Sampling | 6 | 10 | 7 |
| 6009701302 | 648242.5 | 4852830 | RWMP | Monthly Water Quality Sampling | 6 | 11 | 7 |
| 6009701802 | 634680.1 | 4861770 | RWMP/PWQMN | Monthly Water Quality Sampling | 7 | 11 | 7 |
| 6009700302 | 644266 | 4857814 | RWMP | Monthly Water Quality Sampling | 5 | 11 | 6 |
| 97777 | 634214 | 4856823 | RWMP | Monthly Water Quality Sampling | 7 | 11 | 7 |
| 97999 | 640589.4 | 4863887 | RWMP | Monthly Water Quality Sampling | 7 | 11 | 7 |
| Bruce's Mill 1 | 632670 | 4866672 | Special Project |  | 1 | 0 | 0 |
| NCD10 | 638414 | 4861807 | Natural Channel Design | Fish and Benthic Community and In-stream Habitat | 2 | 0 | 0 |
| NCD10-1 | 638417 | 4861745 | Natural Channel Design | Fish and Benthic Community and In-stream Habitat | 1 | 0 | 0 |
| NCD10-2C | 638314 | 4861268 | Natural Channel Design | Fish and Benthic Community and In-stream Habitat | 3 | 0 | 0 |
| NCD13 | 639787 | 4859141 | Natural Channel Design | Fish and Benthic Community and In-stream Habitat | 4 | 1 | 0 |
| NCD13-1C | 639644 | 4859310 | Natural Channel Design | Fish and Benthic Community and In-stream Habitat | 1 | 0 | 0 |
| NCD13-2 | 639768 | 4859185 | Natural Channel Design | Fish and Benthic Community and In-stream Habitat | 3 | 0 | 0 |
| NCD18-2C | 642306 | 4854799 | Natural Channel Design | Fish and Benthic Community and In-stream Habitat | 3 | 2 | 0 |
| NCD18-3 | 642706 | 4854454 | Natural Channel Design | Fish and Benthic Community and In-stream Habitat | 2 | 2 | 0 |
| NCD18-5 | 642978 | 4854075 | Natural Channel Design | Fish and Benthic Community and In-stream Habitat | 3 | 2 | 0 |
| NCD18-6C | 643361 | 4853546 | Natural Channel Design | Fish and Benthic Community and In-stream Habitat | 1 | 0 | 0 |
| NCD20 | 638546 | 4858693 | Natural Channel Design | Fish and Benthic Community and In-stream Habitat | 0 | 2 | 0 |
| NCD30-1 | 638053 | 4859398 | Natural Channel Design | Fish and Benthic Community and In-stream Habitat | 0 | 3 | 0 |
| NCD30-2 | 638180 | 4859132 | Natural Channel Design | Fish and Benthic Community and In-stream Habitat | 0 | 3 | 0 |
| NCD30A | 638172 | 4859179 | Natural Channel Design | Fish and Benthic Community and In-stream Habitat | 0 | 3 | 0 |
| NCD30B | 638021 | 4859447 | Natural Channel Design | Fish and Benthic Community and In-stream Habitat | 0 | 2 | 0 |
| NCD8 | 636417 | 4861201 | Natural Channel Design | Fish and Benthic Community and In-stream Habitat | 1 | 0 | 0 |
| NCD8-2 | 636404 | 4861171 | Natural Channel Design | Fish and Benthic Community and In-stream Habitat | 3 | 4 | 0 |
| NCD8-3 | 636549 | 4861002 | Natural Channel Design | Fish and Benthic Community and In-stream Habitat | 3 | 2 | 0 |
| NCD8-5C | 636749 | 4860713 | Natural Channel Design | Fish and Benthic Community and In-stream Habitat | 1 | 3 | 0 |
| NCD8-6C | 636719 | 4860583 | Natural Channel Design | Fish and Benthic Community and In-stream Habitat | 2 | 3 | 0 |
| NCD8C | 636719 | 4860665 | Natural Channel Design | Fish and Benthic Community and In-stream Habitat | 2 | 0 | 0 |
| RG001WM | 648444 | 4852836 | RWMP | Fish and Benthic Community and In-stream Habitat | 3 | 2 | 0 |
| RG002WM | 648000 | 4852459 | RWMP | Fish and Benthic Community and In-stream Habitat | 2 | 1 | 1 |
| RG003WM | 645356 | 4852365 | RWMP | Fish and Benthic Community and In-stream Habitat | 4 | 1 | 0 |
| RG004WM | 643450 | 4853485 | RWMP | Fish and Benthic Community and In-stream Habitat | 3 | 1 | 0 |
| RG005WM | 641533 | 4855519 | RWMP | Fish and Benthic Community and In-stream Habitat | 5 | 1 | 1 |
| RG006WM | 644753 | 4854280 | RWMP | Fish and Benthic Community and In-stream Habitat | 4 | 1 | 1 |
| RG007WM | 644300 | 4857816 | RWMP | Fish and Benthic Community and In-stream Habitat | 4 | 1 | 1 |
| RG008WM | 644266 | 4857814 | RWMP | Fish and Benthic Community and In-stream Habitat | 3 | 1 | 1 |
| RG009WM | 640609 | 4858865 | RWMP | Fish and Benthic Community and In-stream Habitat | 2 | 1 | 1 |
| RG010WM | 639846 | 4858992 | RWMP | Fish and Benthic Community and In-stream Habitat | 4 | 1 | 0 |
| RG011WM | 640710 | 4863599 | RWMP | Fish and Benthic Community and In-stream Habitat | 2 | 2 | 2 |
| RG012WM | 637638 | 4865825 | RWMP | Fish and Benthic Community and In-stream Habitat | 3 | 1 | 0 |
| RG012WMb | 637672 | 4866989 | RWMP | Fish and Benthic Community and In-stream Habitat | 0 | 0 | 3 |
| RG015WM | 635069 | 4859704 | RWMP | Fish and Benthic Community and In-stream Habitat | 3 | 1 | 0 |
| RG016WM | 634363 | 4859311 | RWMP | Fish and Benthic Community and In-stream Habitat | 4 | 2 | 0 |
| RG017WM | 633040 | 4859992 | RWMP | Fish and Benthic Community and In-stream Habitat | 5 | 1 | 0 |
| RG018WM | 631484 | 4862600 | RWMP | Fish and Benthic Community and In-stream Habitat | 3 | 1 | 1 |
| RG019WM | 633496 | 4865497 | RWMP | Fish and Benthic Community and In-stream Habitat | 3 | 2 | 1 |
| RG020WM | 633889 | 4856420 | RWMP | Fish and Benthic Community and In-stream Habitat | 3 | 1 | 0 |
| RG021WM | 632712 | 4856671 | RWMP | Fish and Benthic Community and In-stream Habitat | 3 | 1 | 0 |
| RG022WM | 629150 | 4860192 | RWMP | Fish and Benthic Community and In-stream Habitat | 2 | 1 | 1 |
| RG023WM | 629462 | 4860196 | RWMP | Fish and Benthic Community and In-stream Habitat | 1 | 2 | 1 |
| RG024WM | 627788 | 4860799 | RWMP | Fish and Benthic Community and In-stream Habitat | 2 | 1 | 1 |
| RG025WM | 626904 | 4863286 | RWMP | Fish and Benthic Community and In-stream Habitat | 3 | 1 | 2 |
| RG026WM | 627868 | 4863607 | RWMP | Fish and Benthic Community and In-stream Habitat | 2 | 1 | 1 |
| RG027WM | 626300 | 4863843 | RWMP | Fish and Benthic Community and In-stream Habitat | 2 | 1 | 1 |
| RNUP 1 | 639458 | 4866673 | Special Project - Rouge Park Restoration/Habitat | Fish, Habitat, Benthics and Water Quality | 0 | 0 | 3 |
| RNUP 3 | 642439 | 4863376 | Special Project - Rouge Park Restoration/Habitat | Fish, Habitat, Benthics and Water Quality | 0 | 0 | 3 |
| RNUP 7 | 640013 | 4865857 | Special Project - Rouge Park Restoration/Habitat | Fish, Habitat, Benthics and Water Quality | 0 | 0 | 2 |
| RNUP N1 | 639641 | 4867570 | Special Project - Rouge Park Restoration/Habitat | Fish, Habitat, Benthics and Water Quality | 0 | 0 | 3 |
| RNUP N2 | 642095 | 4866827 | Special Project - Rouge Park Restoration/Habitat | Fish, Habitat, Benthics and Water Quality | 0 | 0 | 3 |
| ROUGE 2HC6728 | 639479 | 4859753 | Special Project |  | 0 | 1 | 0 |
| ROUGE 2HC7030 | 640256 | 4860086 | Special Project |  | 0 | 1 | 0 |
| Rouge River Mouth - East of Lot | 651343 | 4850765 | Waterfront | Fish Community Survey | 8 | 0 | 1 |

**Table S7** Petticoat Creek monitoring sites sampled for aesthetic condition during 2012, 2013, and/or 2015. Sites are identified by station ID and coordinates, along with associated monitoring program or project.

| **Station ID** | **Coordinates** | | **Monitoring Program/Project** | **Description** | **# Samples** | | |
| --- | --- | --- | --- | --- | --- | --- | --- |
| **Easting** | **Northing** | **2012** | **2013** | **2015** |
| GPC-3 | 649923 | 4853652 | RWMP | Stream Fluvial Geomorphology | 1 | 0 | 0 |
| GPC-4 | 649570 | 4854382 | RWMP | Stream Fluvial Geomorphology | 1 | 0 | 0 |
| GTPC-11 | 648788 | 4855494 | RWMP | Stream Fluvial Geomorphology | 1 | 0 | 0 |
| GTPC-4 | 649222 | 4855793 | RWMP | Stream Fluvial Geomorphology | 1 | 0 | 0 |
| PT001WM | 652005 | 4851804 | RWMP | Fish and Benthic Community and In-stream Habitat | 9 | 13 | 7 |
| PT002WM | 649510 | 4854416 | RWMP | Fish and Benthic Community and In-stream Habitat | 1 | 1 | 1 |
| PT003WM | 649002 | 4855421 | RWMP | Fish and Benthic Community and In-stream Habitat | 0 | 1 | 0 |
| PT004WM | 647346 | 4856554 | RWMP | Fish and Benthic Community and In-stream Habitat | 1 | 1 | 0 |

**Table S8** Duffin Creek monitoring sites sampled for aesthetic condition during 2012, 2013, and/or 2015. Sites are identified by station ID and coordinates, along with associated monitoring program or project.

| **Station ID** | **Coordinates** | | **Monitoring Program/Project** | **Description** | **# Samples** | | |
| --- | --- | --- | --- | --- | --- | --- | --- |
| **Easting** | **Northing** | **2012** | **2013** | **2015** |
| 6010400102 | 657579.3 | 4855880 | RWMP/PWQMN | Monthly Water Quality Sampling | 6 | 11 | 6 |
| 6010400802 | 650372.3 | 4869299 | RWMP/PWQMN | Monthly Water Quality Sampling | 6 | 11 | 7 |
| 6010402302 | 653796 | 4858867 | RWMP | Monthly Water Quality Sampling | 6 | 10 | 7 |
| 6010402902 | 653641.2 | 4868158 | RWMP | Monthly Water Quality Sampling | 6 | 11 | 7 |
| 6010402802 | 654742.4 | 4863433 | RWMP | Monthly Water Quality Sampling | 6 | 11 | 6 |
| 6010402502 | 654656.4 | 4857115 | RWMP | Monthly Water Quality Sampling | 7 | 1 | 1 |
| 6010402602 | 654730.5 | 4859199 | RWMP | Monthly Water Quality Sampling | 6 | 1 | 1 |
| 6010402702 | 655457.9 | 4859419 | RWMP | Monthly Water Quality Sampling | 6 | 11 | 7 |
| 6010403702 | 644191.2 | 4866462 | RWMP | Monthly Water Quality Sampling | 7 | 11 | 7 |
| DF001WM | 657611 | 4855828 | RWMP | Fish and Benthic Community and In-stream Habitat | 2 | 1 | 1 |
| DF002WM | 657190 | 4857434 | RWMP | Fish and Benthic Community and In-stream Habitat | 3 | 1 | 0 |
| DF003WM | 654526 | 4856988 | RWMP | Fish and Benthic Community and In-stream Habitat | 4 | 1 | 2 |
| DF004WM | 653996 | 4858539 | RWMP | Fish and Benthic Community and In-stream Habitat | 4 | 1 | 0 |
| DF005WM | 654781 | 4858979 | RWMP | Fish and Benthic Community and In-stream Habitat | 4 | 1 | 1 |
| DF006WM | 655901 | 4860992 | RWMP | Fish and Benthic Community and In-stream Habitat | 3 | 1 | 1 |
| DF007WM | 653757 | 4860816 | RWMP | Fish and Benthic Community and In-stream Habitat | 3 | 1 | 0 |
| DF008WM | 652754 | 4860497 | RWMP | Fish and Benthic Community and In-stream Habitat | 2 | 1 | 1 |
| DF009WM | 650018 | 4859278 | RWMP | Fish and Benthic Community and In-stream Habitat | 33 | 1 | 2 |
| DF010WM | 649141 | 4859373 | RWMP | Fish and Benthic Community and In-stream Habitat | 2 | 1 | 0 |
| DF011WM | 645865 | 4862672 | RWMP | Fish and Benthic Community and In-stream Habitat | 2 | 1 | 1 |
| DF012WM | 646142 | 4864116 | RWMP | Fish and Benthic Community and In-stream Habitat | 3 | 1 | 0 |
| DF013WM | 644223 | 4866423 | RWMP | Fish and Benthic Community and In-stream Habitat | 2 | 2 | 0 |
| DF014WM | 641828 | 4868444 | RWMP | Fish and Benthic Community and In-stream Habitat | 2 | 1 | 0 |
| DF015WM | 645297 | 4868855 | RWMP | Fish and Benthic Community and In-stream Habitat | 2 | 1 | 0 |
| DF016WM | 643473 | 4870442 | RWMP | Fish and Benthic Community and In-stream Habitat | 2 | 1 | 1 |
| DF017WM | 644304 | 4872835 | RWMP | Fish and Benthic Community and In-stream Habitat | 2 | 1 | 0 |
| DF018WM | 654880 | 4863420 | RWMP | Fish and Benthic Community and In-stream Habitat | 3 | 2 | 1 |
| DF019WM | 654017 | 4867726 | RWMP | Fish and Benthic Community and In-stream Habitat | 2 | 1 | 0 |
| DF020WM | 650292 | 4869244 | RWMP | Fish and Benthic Community and In-stream Habitat | 2 | 1 | 0 |
| DF021WM | 654681 | 4873454 | RWMP | Fish and Benthic Community and In-stream Habitat | 2 | 1 | 2 |
| DH01 | 652828 | 4859626 | Duffin Heights | Stream Flow Measurment | 2 | 0 | 0 |
| DH02 | 653405 | 4859098 | Duffin Heights | Stream Flow Measurment | 3 | 0 | 0 |
| DH03 | 654699 | 4860508 | Duffin Heights | Stream Flow Measurment | 3 | 0 | 0 |
| DH04 | 654569 | 4860014 | Duffin Heights | Stream Flow Measurment | 4 | 0 | 1 |
| DH05 | 654721 | 4859631 | Duffin Heights | Stream Flow Measurment | 2 | 0 | 1 |
| DH06 | 654569 | 4655094 | Duffin Heights | Stream Flow Measurment | 2 | 0 | 1 |
| DH07 | 652917 | 4861040 | Duffin Heights | Stream Flow Measurment | 2 | 0 | 0 |
| Duffins 2HC6783 | 654621 | 4861182 | Special Project |  | 0 | 1 | 0 |
| Duffins Marsh | 657788 | 4853839 | Waterfront | Fish Community Survey | 0 | 0 | 1 |
| Frisco Bridge | 657488 | 4853696 | Special Project - Water Quality Monitoring | Water Quality Sample | 0 | 0 | 1 |
| Frisco DS | 657606 | 4853353 | Special Project - Water Quality Monitoring | Water Quality Sample | 0 | 0 | 3 |
| Frisco Lake | 657617 | 4863301 | Special Project - Water Quality Monitoring | Water Quality Sample | 0 | 0 | 1 |
| Frisco US | 657085 | 4853930 | Special Project - Water Quality Monitoring | Water Quality Sample | 0 | 0 | 3 |
| GBC-3 | 653514 | 4864278 | RWMP | Stream Fluvial Geomorphology | 1 | 0 | 0 |
| GBC-4 | 653925 | 4865383 | RWMP | Stream Fluvial Geomorphology | 1 | 0 | 0 |
| GDC-3 | 654859 | 4857909 | RWMP | Stream Fluvial Geomorphology | 2 | 0 | 0 |
| GGC-4 | 655443 | 4859385 | RWMP | Stream Fluvial Geomorphology | 1 | 0 | 0 |
| GMC-1 | 653168 | 4868218 | RWMP | Stream Fluvial Geomorphology | 1 | 0 | 0 |
| GMC-2 | 650480 | 4869277 | RWMP | Stream Fluvial Geomorphology | 1 | 0 | 0 |
| GMC-4 | 649526 | 4869109 | RWMP | Stream Fluvial Geomorphology | 1 | 0 | 0 |
| GRC-1 | 643637 | 4867531 | RWMP | Stream Fluvial Geomorphology | 1 | 0 | 0 |
| GRC-2 | 643745 | 4869153 | RWMP | Stream Fluvial Geomorphology | 2 | 0 | 0 |
| GSV-1 | 643312 | 4867453 | RWMP | Stream Fluvial Geomorphology | 1 | 0 | 0 |
| GTDC-2 | 653982 | 4868742 | RWMP | Stream Fluvial Geomorphology | 1 | 0 | 0 |
| GTDC-6 | 653206 | 4871671 | RWMP | Stream Fluvial Geomorphology | 1 | 0 | 0 |
| GTDC-8 | 652032 | 4871343 | RWMP | Stream Fluvial Geomorphology | 1 | 0 | 0 |
| GUC-2 | 654718 | 4859738 | RWMP | Stream Fluvial Geomorphology | 1 | 0 | 0 |
| GWD-10 | 644581 | 4866442 | RWMP | Stream Fluvial Geomorphology | 1 | 0 | 0 |
| GWD-13 | 647405 | 4867433 | RWMP | Stream Fluvial Geomorphology | 1 | 0 | 0 |
| GWD-14 | 645381 | 4868800 | RWMP | Stream Fluvial Geomorphology | 1 | 0 | 0 |
| GWD-15 | 645118 | 4869099 | RWMP | Stream Fluvial Geomorphology | 1 | 0 | 0 |
| GWD-8 | 646733 | 4865190 | RWMP | Stream Fluvial Geomorphology | 1 | 0 | 0 |
| GWV-1 | 649551 | 4859818 | RWMP | Stream Fluvial Geomorphology | 1 | 0 | 0 |
| GWX-2 | 646398 | 4871288 | RWMP | Stream Fluvial Geomorphology | 1 | 0 | 0 |
| GWX-3 | 646255 | 4872247 | RWMP | Stream Fluvial Geomorphology | 1 | 0 | 0 |
| NCD11 | 657849 | 4860676 | Natural Channel Design | Fish and Benthic Community and In-stream Habitat | 1 | 0 | 0 |
| NCD11-1C | 657689 | 4860821 | Natural Channel Design | Fish and Benthic Community and In-stream Habitat | 1 | 0 | 0 |
| NCD11-2 | 657852 | 4860666 | Natural Channel Design | Fish and Benthic Community and In-stream Habitat | 2 | 0 | 0 |
| NCD11-3C | 657910 | 4859735 | Natural Channel Design | Fish and Benthic Community and In-stream Habitat | 2 | 1 | 0 |
| NCD11-B | 657845 | 4860637 | Natural Channel Design | Fish and Benthic Community and In-stream Habitat | 0 | 2 | 0 |

**Table S9** Carruthers Creek monitoring sites sampled for aesthetic condition during 2012, 2013, and/or 2015. Sites are identified by station ID and coordinates, along with associated monitoring program or project.

| **Station ID** | **Coordinates** | | **Monitoring Program/Project** | **Description** | **# Samples** | | |
| --- | --- | --- | --- | --- | --- | --- | --- |
| **Easting** | **Northing** | **2012** | **2013** | **2015** |
| 6010700202 | 660849.6 | 4856973 | RWMP | Monthly Water Quality Sampling | 6 | 10 | 6 |
| Carruthers Marsh | 662011 | 4854737 | Waterfront | Fish Community Survey | 0 | 0 | 1 |
| CC001WM | 661135 | 4855581 | RWMP | Fish and Benthic Community and In-stream Habitat | 4 | 1 | 1 |
| CC002WM | 660295 | 4858871 | RWMP | Fish and Benthic Community and In-stream Habitat | 4 | 1 | 1 |
| CC003WM | 658947 | 4863529 | RWMP | Fish and Benthic Community and In-stream Habitat | 2 | 2 | 1 |
| CC005 | 658808 | 4863072 | Special Project | Fish Community Survey | 1 | 0 | 2 |
| CC007 | 658391 | 4865415 | Special Project | Fish Community Survey | 1 | 0 | 0 |
| CC011 | 656605 | 4866265 | Special Project | Fish Community Survey | 0 | 0 | 2 |
| CC015 | 659166 | 4862710 | Special Project | Fish Community Survey | 0 | 0 | 1 |
| CCWP-10 | 671472 | 4866444 | RWMP | Stream Fluvial Geomorphology | 0 | 0 | 1 |
| GCC-12 | 655190 | 4868098 | RWMP | Stream Fluvial Geomorphology | 1 | 0 | 0 |
| GCC-4 | 659396 | 4861684 | RWMP | Stream Fluvial Geomorphology | 1 | 0 | 0 |
| GTCC-5 | 658560 | 4864776 | RWMP | Stream Fluvial Geomorphology | 1 | 0 | 0 |
| GTCC-9 | 656061 | 4867917 | RWMP | Stream Fluvial Geomorphology | 1 | 0 | 0 |

**Table S10** Frenchman’s Bay monitoring sites sampled for aesthetic condition during 2012, 2013, and/or 2015. Sites are identified by station ID and coordinates, along with associated monitoring program or project.

| **Station ID** | **Coordinates** | | **Monitoring Program/Project** | **Description** | **# Samples** | | |
| --- | --- | --- | --- | --- | --- | --- | --- |
| **Easting** | **Northing** | **2012** | **2013** | **2015** |
| FB001WM | 652387 | 4854517 | RWMP | Fish and Benthic Community and In-stream Habitat | 2 | 1 | 0 |
| FB002WM | 652754 | 4853833 | RWMP | Fish and Benthic Community and In-stream Habitat | 1 | 1 | 0 |
| FB003WM | 653673 | 4854372 | RWMP | Fish and Benthic Community and In-stream Habitat | 6 | 12 | 7 |
| FB004WM | 654992 | 4853943 | RWMP | Fish and Benthic Community and In-stream Habitat | 3 | 1 | 0 |
| Frenchman's Bay 2HC6791 | 653263 | 4855231 | Special Project |  | 0 | 1 | 0 |

**Table S11** Remedial Action Plan (RAP) Waterfront monitoring sites sampled for aesthetic condition during 2012, 2013, and/or 2015. Sites are identified by station ID and coordinates, along with associated monitoring program or project.

| **Station ID** | **Coordinates** | | **Monitoring Program/Project** | **Description** | **# Samples** | | |
| --- | --- | --- | --- | --- | --- | --- | --- |
| **Easting** | **Northing** | **2012** | **2013** | **2015** |
| Ashbridges Bay Boat Basin | 636359 | 4835220 | Waterfront | Fish Community Survey | 1 | 0 | 0 |
| Ashbridges bay Coatsworth Cut | 635962 | 4835340 | Waterfront | Fish Community Survey | 1 | 0 | 0 |
| Ashbridges Bay West Side | 635780 | 4835190 | Waterfront | Fish Community Survey | 1 | 0 | 0 |
| Bluffers Park Boat Basin - N of Marina Docks | 642593 | 4841232 | Waterfront | Fish Community Survey | 2 | 0 | 0 |
| Bluffers Park Marina | 642779 | 4841039 | Waterfront | Fish Community Survey | 2 | 0 | 0 |
| Colonel Sam Smith Park Boat Basin | 619858 | 4827192 | Waterfront | Fish Community Survey | 1 | 0 | 0 |
| Colonel Sam Smith park, Outer Wall | 619944 | 4827070 | Waterfront | Fish Community Survey | 1 | 0 | 0 |
| Dragon Boat Shoreline | 626212 | 4832130 | Waterfront | Fish Community Survey | 1 | 0 | 0 |
| Etobicoke Creek, Marie Curtis Park | 617786 | 4826750 | Waterfront | Fish Community Survey | 1 | 0 | 0 |
| Hern Generating Station | 634858 | 4834070 | Waterfront | Fish Community Survey | 2 | 0 | 0 |
| Highland Creek - Eastern Beach | 649383 | 4847625 | Waterfront | Fish Community Survey | 3 | 0 | 0 |
| Highland Creek Mouth 100m East | 649392 | 4847680 | Waterfront | Fish Community Survey | 7 | 0 | 1 |
| Highland Creek Mouth 200m West | 649187 | 4847480 | Waterfront | Fish Community Survey | 7 | 0 | 1 |
| Humber Bay - East Headland | 622969 | 4831430 | Waterfront | Fish Community Survey | 3 | 0 | 0 |
| Humber Bay East - Fishing Pier | 623098 | 4831260 | Waterfront | Fish Community Survey | 1 | 0 | 0 |
| Humber Bay East - Revetment | 623173 | 4831832 | Waterfront | Fish Community Survey | 1 | 0 | 0 |
| Humber Bay East - Southern Wetland | 623102 | 4831200 | Waterfront | Fish Community Survey | 3 | 0 | 0 |
| Humber Bay East - West Islands | 622913 | 4831320 | Waterfront | Fish Community Survey | 2 | 0 | 0 |
| Humber Bay Park West - Marina Del Ray | 622196 | 4830219 | Waterfront | Fish Community Survey | 7 | 0 | 0 |
| Humber Bay Park West - Superior Ave. | 622192 | 4830200 | Waterfront | Fish Community Survey | 7 | 0 | 0 |
| Humber River Estuary - East Shore at Mouth | 623330 | 4832171 | Waterfront | Fish Community Survey | 1 | 0 | 0 |
| Mimico Linear Seine East | 622127 | 4830028 | Waterfront | Fish Community Survey | 2 | 0 | 4 |
| Ontario Place | 627589 | 4831900 | Waterfront | Fish Community Survey | 1 | 0 | 0 |
| Port Union - Adams Creek Mouth | 650822 | 4849620 | Waterfront | Fish Community Survey | 10 | 0 | 1 |
| Port Union - Adams Creek Mouth 100m East | 650950 | 4849756 | Waterfront | Fish Community Survey | 9 | 0 | 1 |
| Port Union 50m east of cobble beach | 650116 | 4848574 | Waterfront | Fish Community Survey | 9 | 0 | 0 |
| Port Union Amourstone East | 655115 | 4849055 | Waterfront | Fish Community Survey | 4 | 0 | 0 |
| Port Union Armourstone West | 649836 | 4848100 | Waterfront | Fish Community Survey | 4 | 0 | 0 |
| Port Union East Point Boat Launch | 648881 | 4847022 | Waterfront | Fish Community Survey | 8 | 0 | 1 |
| Port Union Highland Creek Estuary beach | 649356 | 4847620 | Waterfront | Fish Community Survey | 1 | 0 | 0 |
| Port Union natural Shoreline | 650954 | 4849760 | Waterfront | Fish Community Survey | 4 | 0 | 0 |
| Port Union Rouge Beach - West of Mouth | 651514 | 4850690 | Waterfront | Fish Community Survey | 3 | 0 | 0 |
| Rouge Beach | 651506 | 4850779 | Waterfront | Fish Community Survey | 1 | 0 | 0 |
| Rouge River Mouth - Rouge Beach | 651355 | 4850547 | Waterfront | Fish Community Survey | 9 | 0 | 1 |
| Scarborough Shoreline - East of Scarborough Bluffs | 645007 | 4844246 | Waterfront | Fish Community Survey | 1 | 0 | 0 |
| Scarborough Shoreline - Meadowcliffe | 643533 | 4842610 | Waterfront | Fish Community Survey | 4 | 0 | 0 |
| Scarborough Shoreline - South Marine Dr. | 644733 | 4844060 | Waterfront | Fish Community Survey | 1 | 0 | 0 |
| Scarborough Shoreline - Sylvan Ave. 1st & 2nd | 644474 | 4843908 | Waterfront | Fish Community Survey | 1 | 0 | 0 |
| Scarborough Shoreline - Sylvan Ave. S of Heathfield | 644001 | 4843340 | Waterfront | Fish Community Survey | 3 | 0 | 0 |
| Tommy Thompson Park Cell 1 | 635261 | 4832473 | Waterfront | Fish Community Survey | 2 | 0 | 0 |
| Tommy Thompson Park Cell 2 | 635066 | 4832050 | Waterfront | Fish Community Survey | 1 | 0 | 0 |
| Tommy Thompson Park Cell 3 | 634956 | 4831760 | Waterfront | Fish Community Survey | 1 | 0 | 0 |
| Tommy Thompson Park Embayment A | 633881 | 4831084 | Waterfront | Fish Community Survey | 3 | 0 | 0 |
| Tommy Thompson Park Embayment B East Side | 634137 | 4831660 | Waterfront | Fish Community Survey | 1 | 0 | 0 |
| Tommy Thompson Park Embayment B East Wetland | 634107 | 4831368 | Waterfront | Fish Community Survey | 1 | 0 | 0 |
| Tommy Thompson Park Embayment B West | 633989 | 4831341 | Waterfront | Fish Community Survey | 1 | 0 | 0 |
| Tommy Thompson Park Embayment C | 634684 | 4832236 | Waterfront | Fish Community Survey | 1 | 0 | 0 |
| Tommy Thompson Park Embayment C 100 m west of bridge | 634419 | 4831657 | Waterfront | Fish Community Survey | 1 | 0 | 0 |
| Tommy Thompson Park Embayment C east of marina | 634782 | 4832167 | Waterfront | Fish Community Survey | 1 | 0 | 0 |
| Tommy Thompson Park Embayment C North East Shore | 634778 | 4832224 | Waterfront | Fish Community Survey | 1 | 0 | 0 |
| Tommy Thompson Park Embayment C SE Footpad + NW Footpad | 634355 | 4831670 | Waterfront | Fish Community Survey | 1 | 0 | 0 |
| Tommy Thompson Park Embayment C South Shore | 634431 | 4831703 | Waterfront | Fish Community Survey | 1 | 0 | 0 |
| Tommy Thompson Park Embayment C west shore | 634290 | 4831746 | Waterfront | Fish Community Survey | 1 | 0 | 0 |
| Tommy Thompson Park Embayment D | 634954 | 4832493 | Waterfront | Fish Community Survey | 2 | 0 | 0 |
| Tommy Thompson Park Embayment D East Shore | 635023 | 4832649 | Waterfront | Fish Community Survey | 1 | 0 | 0 |
| Tommy Thompson Park Embayment D West Shore | 634831 | 4832488 | Waterfront | Fish Community Survey | 1 | 0 | 0 |
| Tommy Thompson Park OHM | 635219 | 4833495 | Waterfront | Fish Community Survey | 1 | 0 | 0 |
| Toronto Harbour - Bathurst St Slip | 629431 | 4832560 | Waterfront | Fish Community Survey | 4 | 0 | 0 |
| Toronto Harbour - Jarvis Slip | 631657 | 4833490 | Waterfront | Fish Community Survey | 1 | 0 | 0 |
| Toronto Harbour - Parliament Slip | 632306 | 4833820 | Waterfront | Fish Community Survey | 3 | 0 | 0 |
| Toronto Harbour - Reese Slip | 630118 | 4832870 | Waterfront | Fish Community Survey | 3 | 0 | 0 |
| Toronto Harbour - Spadina Quay | 629722 | 4832750 | Waterfront | Fish Community Survey | 3 | 0 | 0 |
| Toronto Harbour - Spadina Slip | 629733 | 4832874 | Waterfront | Fish Community Survey | 1 | 0 | 0 |
| Toronto Harbour - York Slip | 630710 | 4833027 | Waterfront | Fish Community Survey | 1 | 0 | 0 |
| Toronto Inner Harbour - Simcoe St slip | 630358 | 4832945 | Waterfront | Fish Community Survey | 2 | 0 | 0 |
| Toronto Inner Harbour - Spadina Slip Outer breakwall | 629744 | 4832780 | Waterfront | Fish Community Survey | 3 | 0 | 0 |
| Toronto Island, Trout Pond | 630125 | 4830350 | Waterfront | Fish Community Survey | 1 | 0 | 0 |
| Toronto Islands, Ojibway Ave bridge | 631189 | 4830814 | Waterfront | Fish Community Survey | 1 | 0 | 0 |

**Table S12** Waterfront (Non-RAP) monitoring sites sampled for aesthetic condition during 2012, 2013, and/or 2015. Sites are identified by station ID and coordinates, along with associated monitoring program or project.

| **Station ID** | **Coordinates** | | **Monitoring Program/Project** | **Description** | **# Samples** | | |
| --- | --- | --- | --- | --- | --- | --- | --- |
| **Easting** | **Northing** | **2012** | **2013** | **2015** |
| Frenchman's Bay | 653273 | 4853236 | Waterfront | Fish Community Survey | 2 | 0 | 1 |
| Frenchman's Bay - East Shore | 654007 | 4853220 | Waterfront | Fish Community Survey | 2 | 0 | 0 |
| Frenchman's Bay - North Shore | 653088 | 4853430 | Waterfront | Fish Community Survey | 1 | 0 | 0 |
| Frenchman's Bay - South Shore | 653236 | 4852780 | Waterfront | Fish Community Survey | 1 | 0 | 0 |
| Frenchman's Bay - Southeast Shore | 653233 | 4852795 | Waterfront | Fish Community Survey | 2 | 0 | 0 |
| Frenchman's Bay - West Shore | 653086 | 4853350 | Waterfront | Fish Community Survey | 2 | 0 | 0 |
| Frenchman's Beach - Pickering Beach | 653322 | 4852648 | Waterfront | Fish Community Survey | 1 | 0 | 0 |
| Pickering Shoreline NGS Revetment - Inlet to Discharge | 656031 | 4852190 | Waterfront | Fish Community Survey | 1 | 0 | 0 |
| Pickering Shoreline NGS Revetment East | 655343 | 4852300 | Waterfront | Fish Community Survey | 1 | 0 | 0 |
| Pickering Shoreline NGS Revetment West | 655115 | 4852680 | Waterfront | Fish Community Survey | 1 | 0 | 0 |
